# Supplementary figures and images for: pH-driven optical changes of platinum(ii) complexes having carboxy-appended salophen ligands
Source: Royal Society of Chemistry journal article supplement (doi:10.1039/d3dt00956d), 2023-01-01

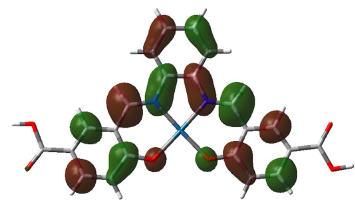

**LUMO**

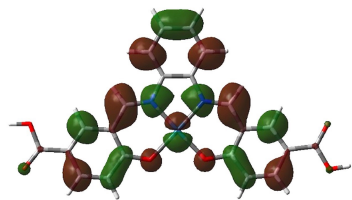

**LUMO+1**

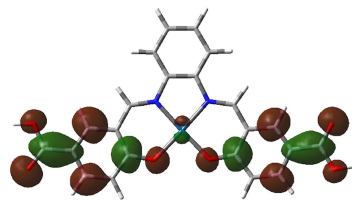

**LUMO+2**

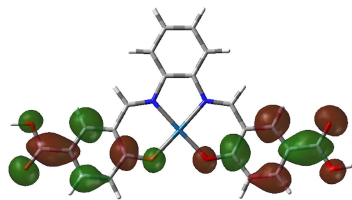

**LUMO+3**

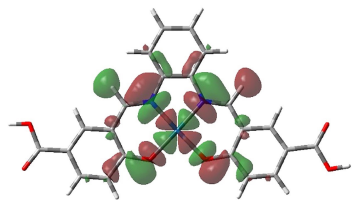

**LUMO+4**

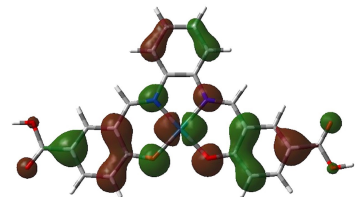

**HOMO**

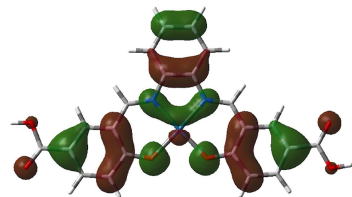

**HOMO-1**

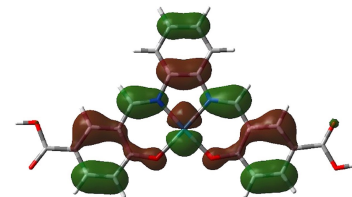

**HOMO-2**

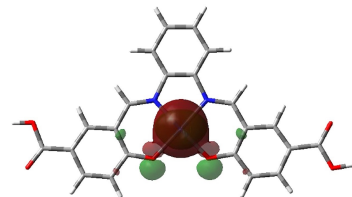

**HOMO-3**

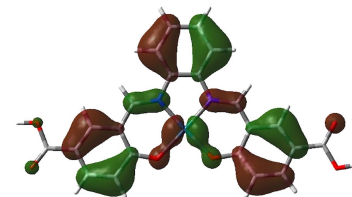

**HOMO-4**

Supplement: d3dt00956d2.pdf [file d3dt00956d2.pdf]

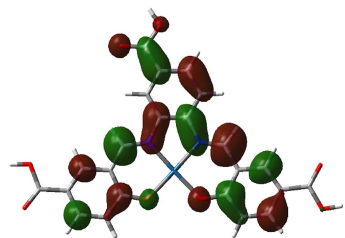

**LUMO**

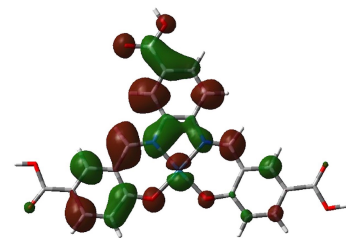

**LUMO+1**

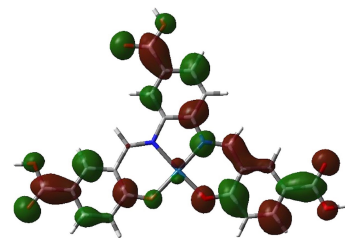

**LUMO+2**

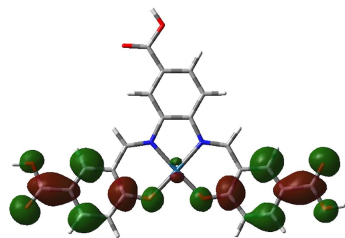

**LUMO+3**

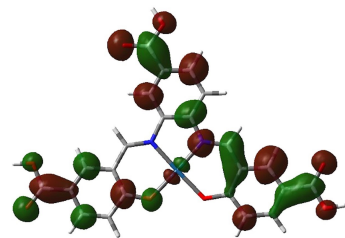

**LUMO+4**

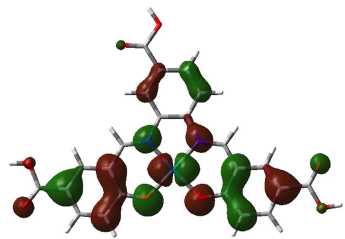

**HOMO**

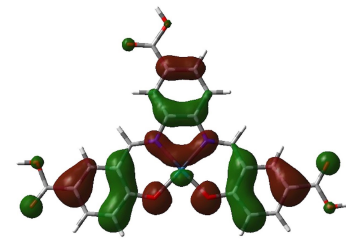

**HOMO-1**

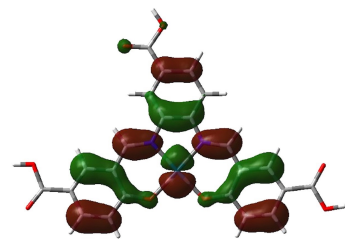

**HOMO-2**

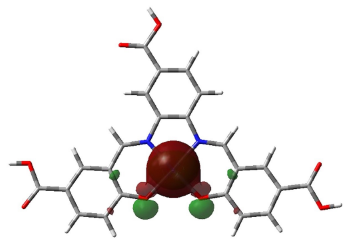

**HOMO-3**

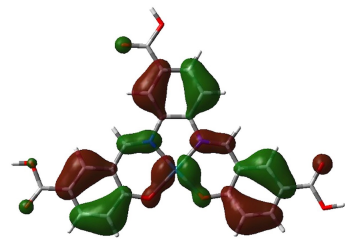

**HOMO-4**

Supplement: d3dt00956d3.pdf [file d3dt00956d3.pdf]

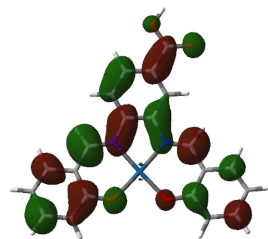

**LUMO**

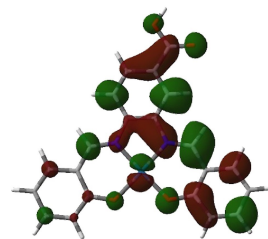

**LUMO+1**

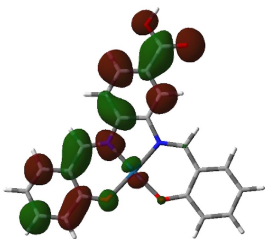

**LUMO+2**

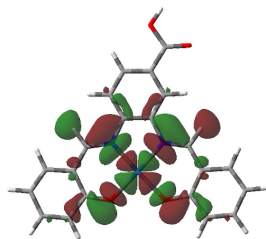

**LUMO+3**

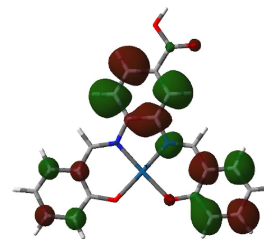

**LUMO+4**

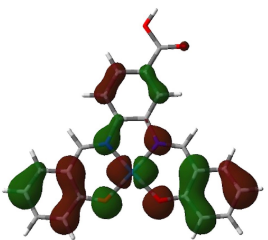

**HOMO**

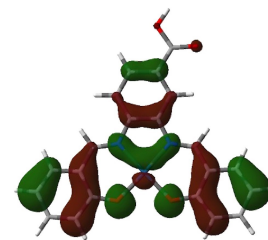

**HOMO-1**

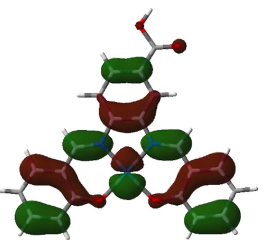

**HOMO-2**

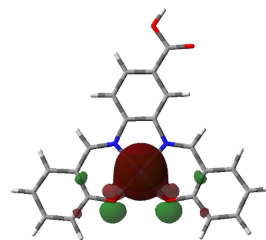

**HOMO-3**

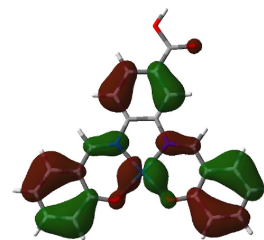

**HOMO-4**

Supplement: d3dt00956d4.pdf [file d3dt00956d4.pdf]

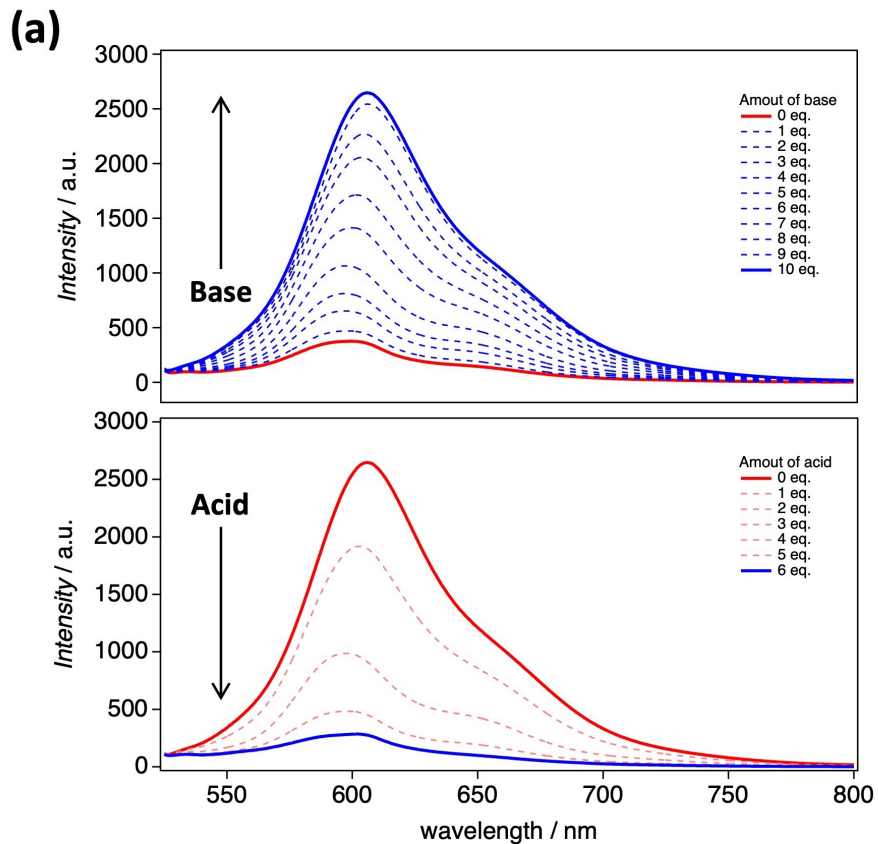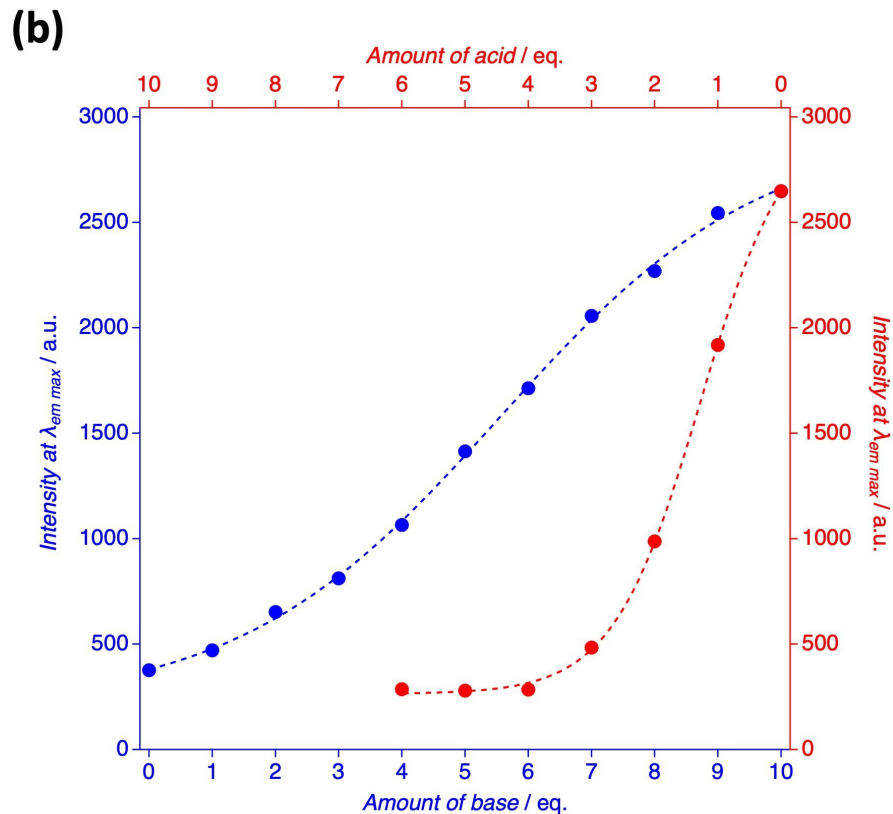

Supplement: d3dt00956d5.pdf [file d3dt00956d5.pdf]

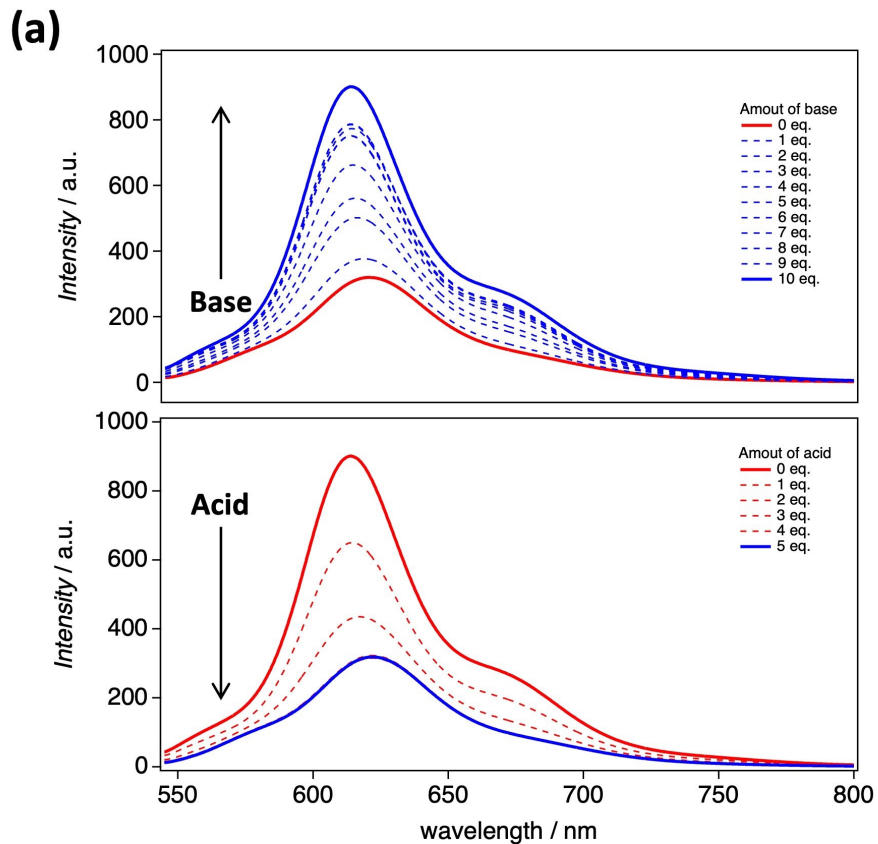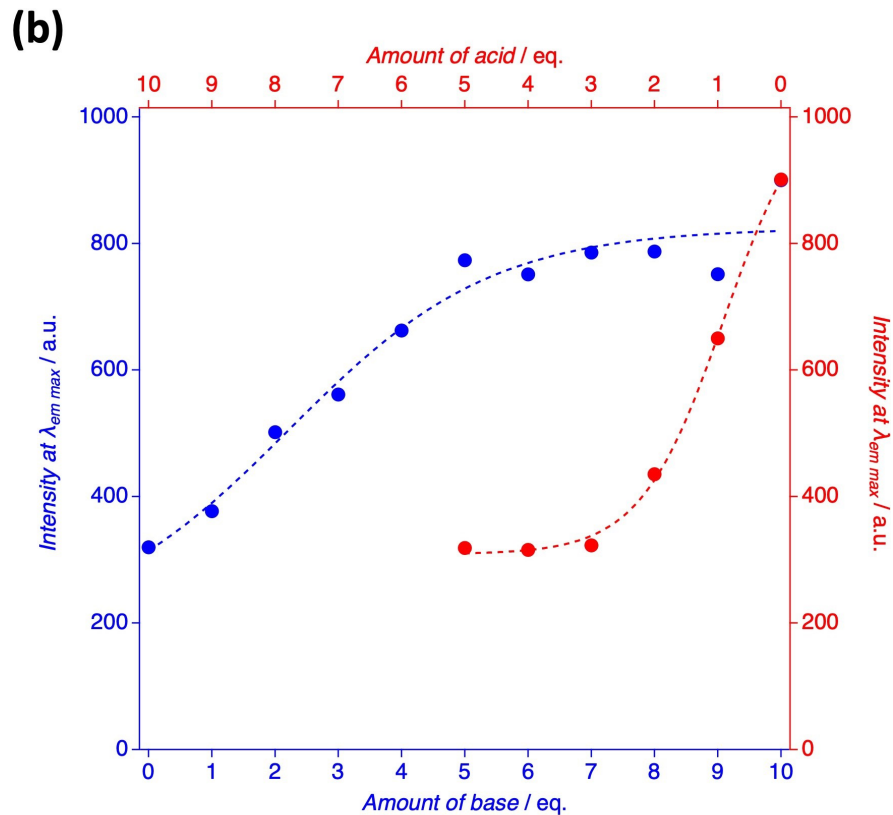

Supplement: d3dt00956d6.pdf [file d3dt00956d6.pdf]

(a) pH = 2

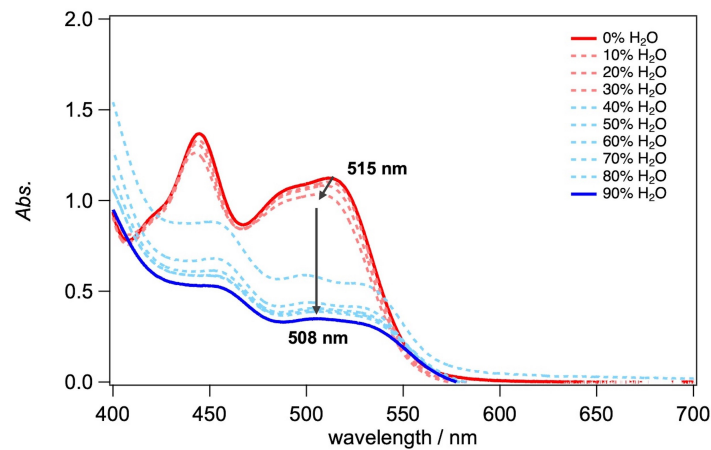

(b) pH = 6.4

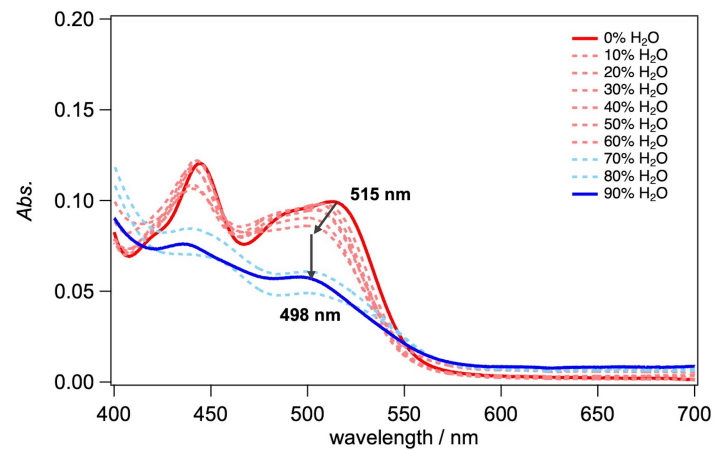

(c) pH = 13

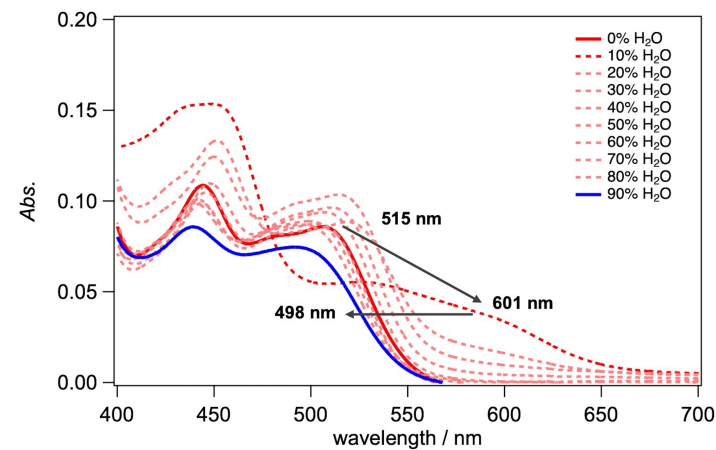

(d) pH = 2

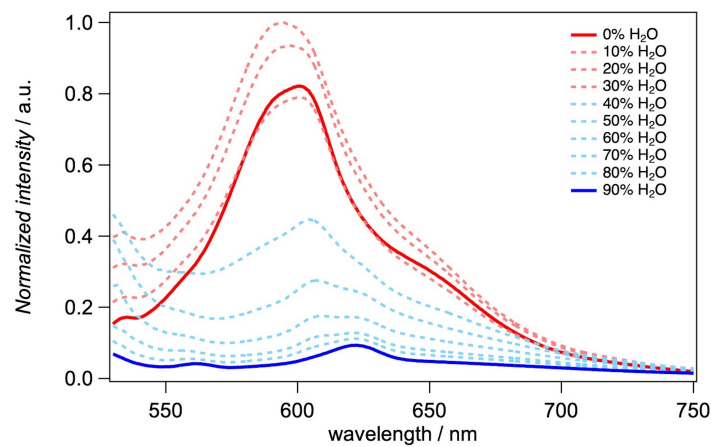

(e) pH = 6.4

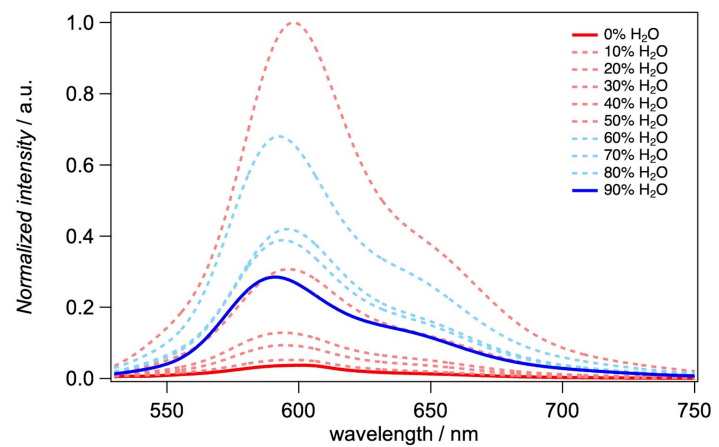

(f) pH = 13

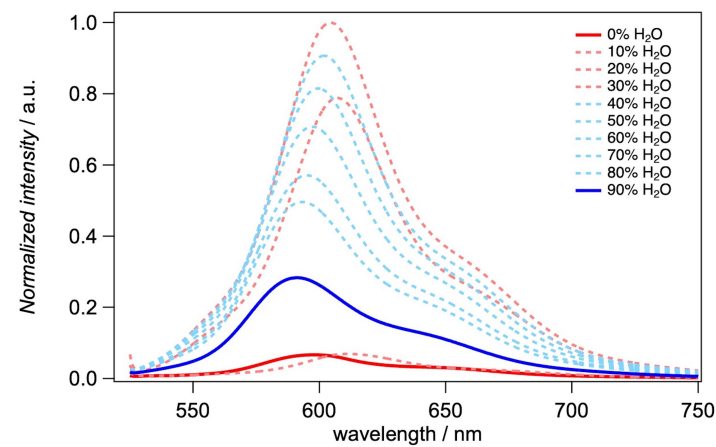

Supplement: d3dt00956d7.pdf [file d3dt00956d7.pdf]

(a) pH = 2

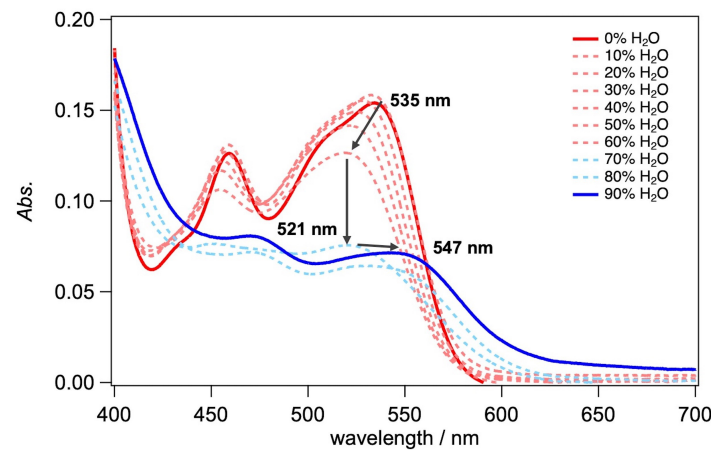

(b) pH = 6.4

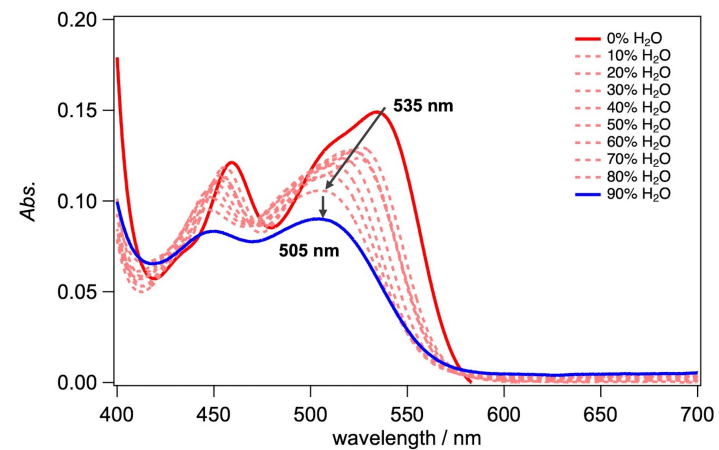

(c) pH = 13

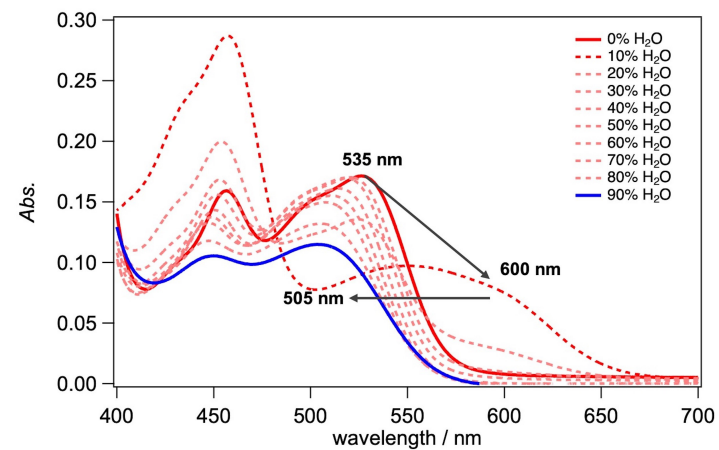

(d) pH = 2

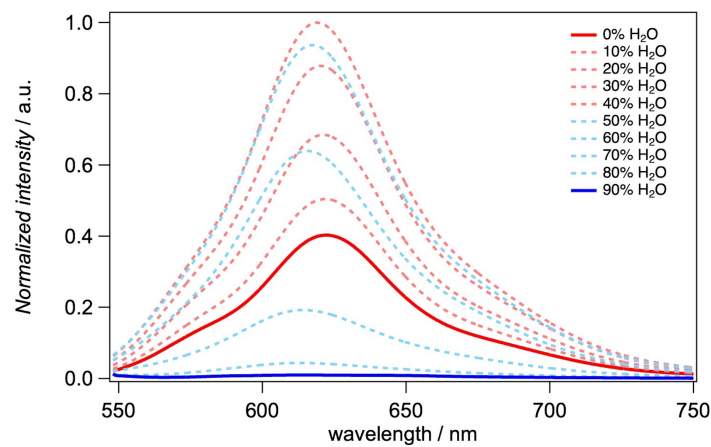

(e) pH = 6.4

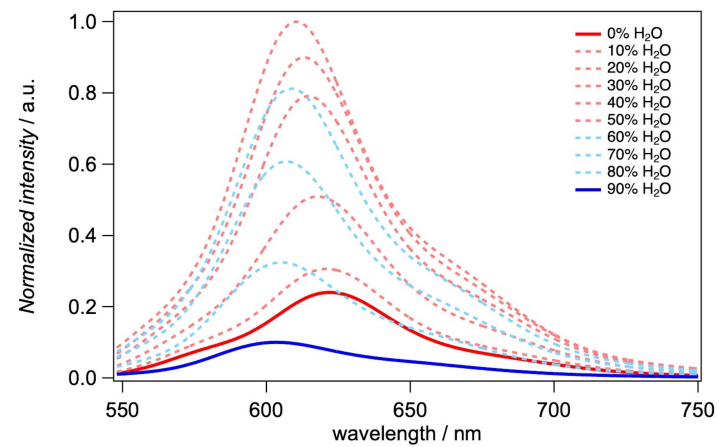

(f) pH = 13

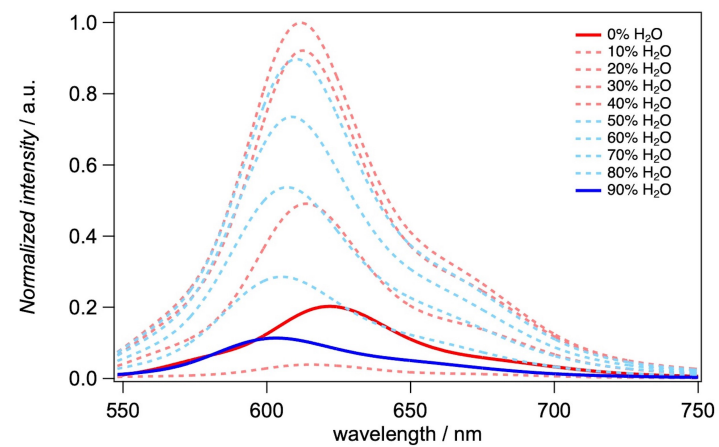

Supplement: d3dt00956d8.pdf [file d3dt00956d8.pdf]

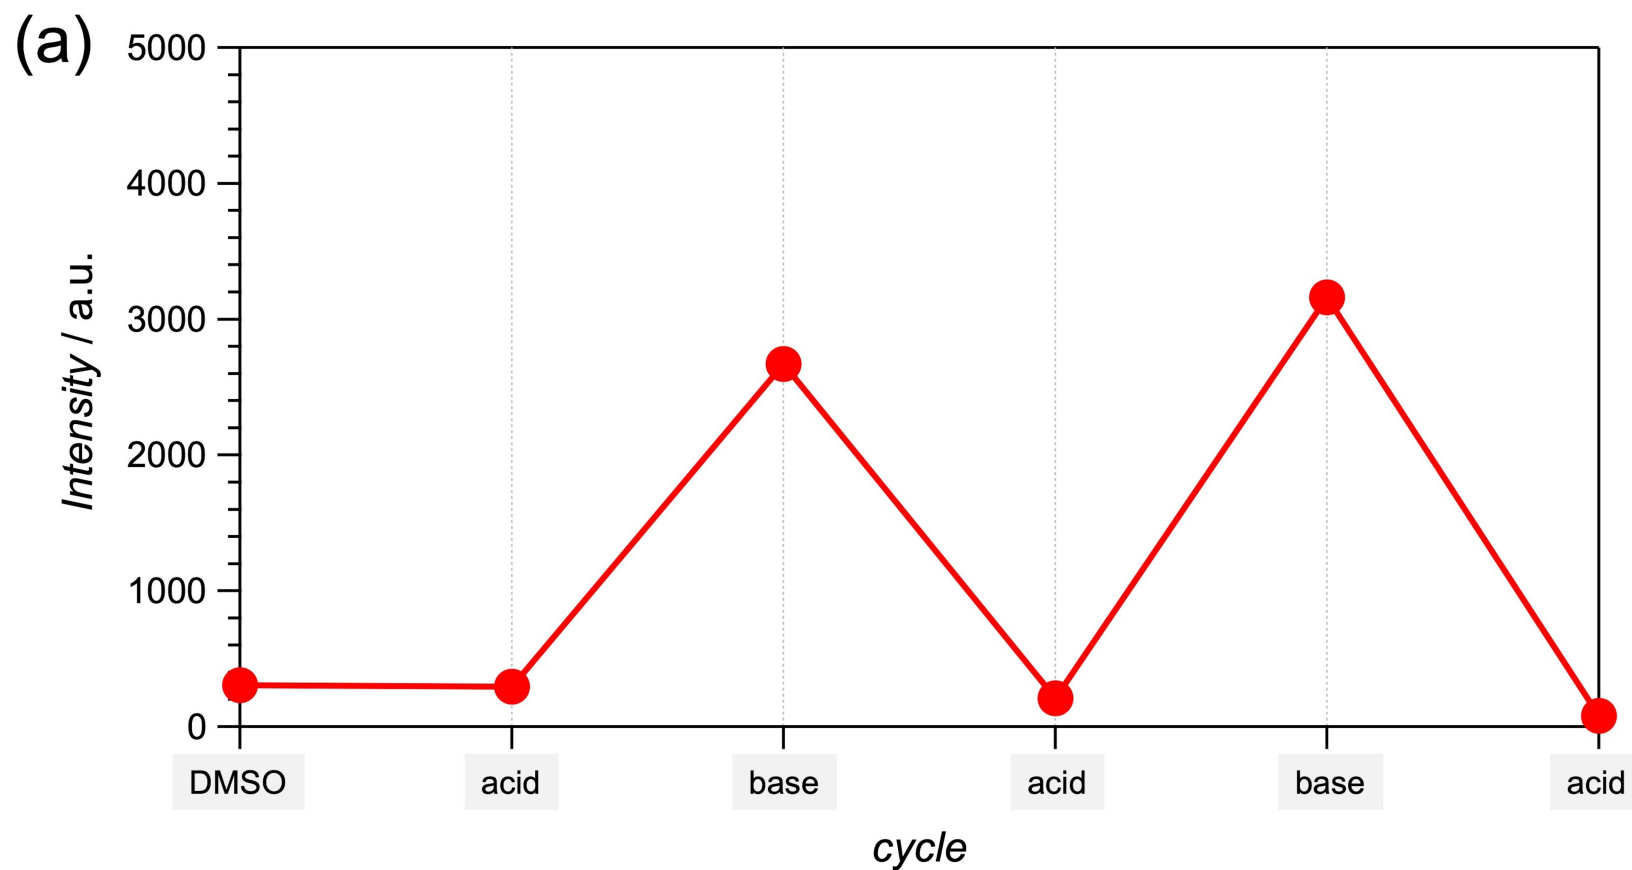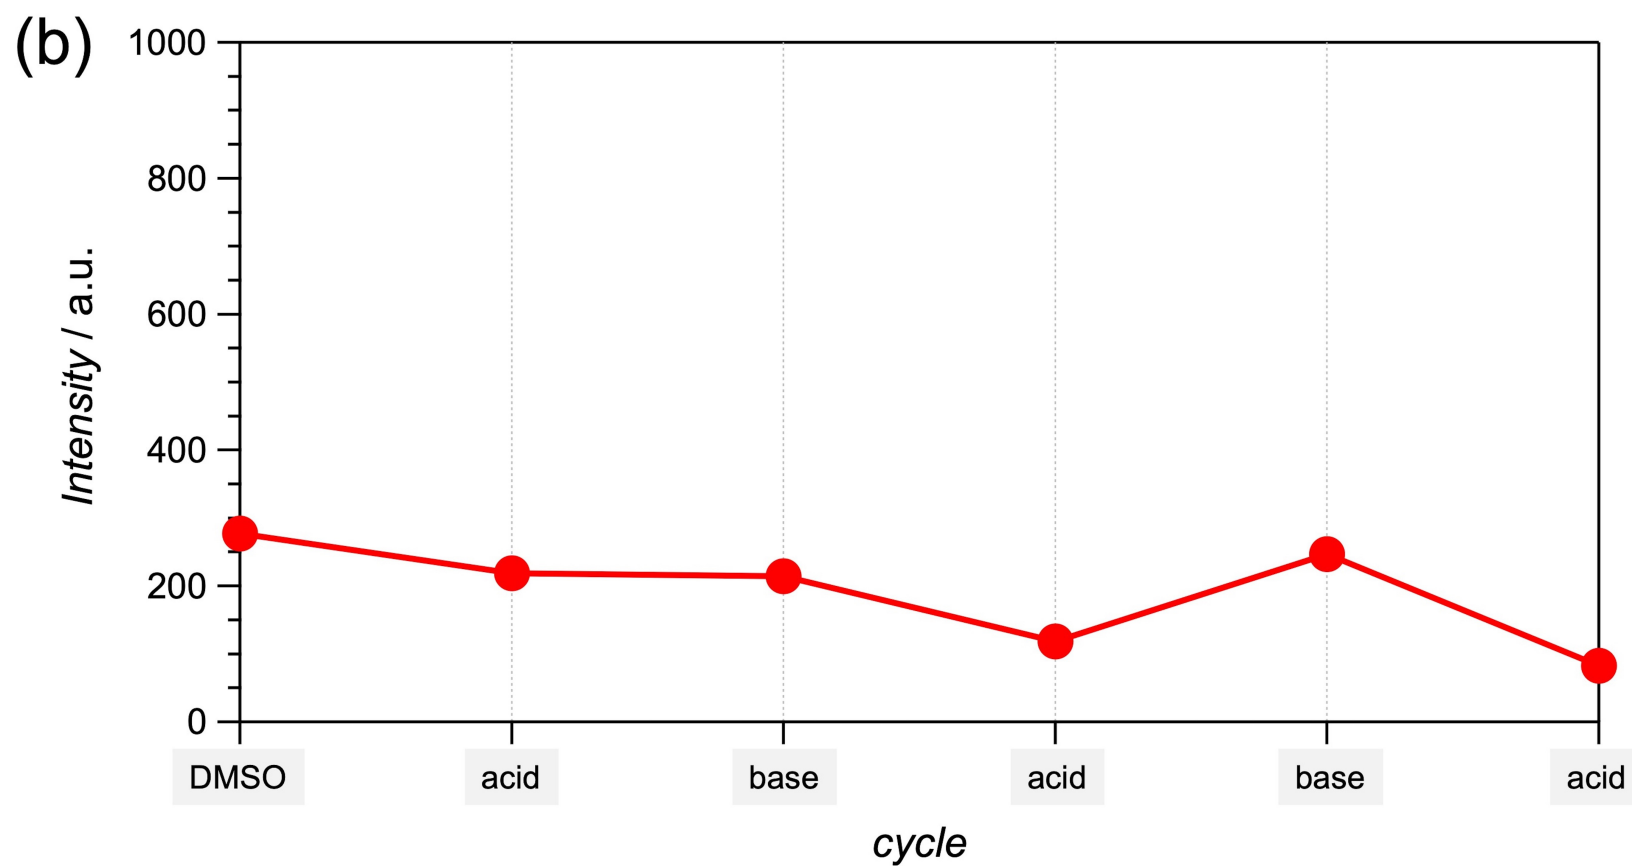

Supplement: d3dt00956d9.pdf [file d3dt00956d9.pdf]
